# Supplementary material for: Insensitive energetic compounds: alkaline earth metal salts of 5,5′-dinitramino-3,3′-methylene-1H-1,2,4-bistriazolate
Source: Royal Society of Chemistry journal article supplement (doi:10.1039/d0nj03773g), 2020-01-01
Supplement: d0nj03773g1.pdf [file d0nj03773g1.pdf]

## Electronic Supplementary Information

### **Insensitive Energetic Compounds: Alkaline Earth Metal Salts of 5,5'- dinitramino-3,3'-methylene-1H-1,2,4-bistriazolate**

Yanna Wang<sup>a,b</sup>, Xiaoming Yang<sup>a</sup>, Jie Hu<sup>b</sup>, Haibo Li<sup>a</sup>, Zhimin Li<sup>\*a</sup>, Tonglai Zhang<sup>\*a</sup>

<sup>a</sup> State Key Laboratory of Explosion Science and Technology, Beijing Institute of Technology, Beijing, China; <sup>b</sup> College of Chemistry and Chemical Engineering, Xingtai University, Xingtai, China

\*Corresponding author: Tonglai Zhang and Zhimin Li

Email:

Tonglai Zhang: [ztlbit@bit.edu.cn](mailto:ztlbit@bit.edu.cn)

Zhimin Li: [lizm@bit.edu.cn](mailto:lizm@bit.edu.cn)

## **Table of contents**

- 1. Crystal data and structure refinement details of compounds 1-3**
- 2. X-ray crystallography**
- 3. The distances of hydrogen bonds of compounds 1-3**
- 4. The first exothermic decomposition peak temperature with four heating rates**
- 5. Non-isothermal kinetics analysis**
- 6. The calculation of thermodynamics parameters**
- 7. References**

## 1. Crystal data and structure refinement details of compounds 1-3

**Table S1 X-ray crystallographic data for compounds 1-3**

| Compound                     | 1                                                                 | 2                                                                               | 3                                                                               |
|------------------------------|-------------------------------------------------------------------|---------------------------------------------------------------------------------|---------------------------------------------------------------------------------|
| Formula                      | C <sub>5</sub> H <sub>18</sub> MgN <sub>10</sub> O <sub>11</sub>  | C <sub>10</sub> H <sub>44</sub> Ca <sub>2</sub> N <sub>20</sub> O <sub>26</sub> | C <sub>10</sub> H <sub>34</sub> N <sub>20</sub> O <sub>21</sub> Sr <sub>2</sub> |
| M (g·mol <sup>-1</sup> )     | 418.60                                                            | 940.81                                                                          | 945.81                                                                          |
| Cryst. Syst.                 | monoclinic                                                        | monoclinic                                                                      | orthorhombic                                                                    |
| Space Group                  | <i>P</i> 21/ <i>c</i>                                             | <i>P</i> 21/ <i>n</i>                                                           | <i>P</i> bca                                                                    |
| <i>a</i> (Å)                 | 10.8475                                                           | 20.6915                                                                         | 17.068(3)                                                                       |
| <i>b</i> (Å)                 | 8.7335                                                            | 8.2319                                                                          | 17.764(4)                                                                       |
| <i>c</i> (Å)                 | 17.6426                                                           | 21.7079                                                                         | 21.772(4)                                                                       |
| β (deg.)                     | 91.275                                                            | 91.831                                                                          | 90                                                                              |
| V (Å <sup>3</sup> )          | 1671.0(6)                                                         | 3695.6(13)                                                                      | 6601(2)                                                                         |
| Z                            | 4                                                                 | 4                                                                               | 8                                                                               |
| ρ (g·cm <sup>-3</sup> )      | 1.664                                                             | 1.691                                                                           | 1.903                                                                           |
| F(000)                       | 872                                                               | 1968                                                                            | 3824                                                                            |
| Index ranges                 | -13 ≤ <i>h</i> ≤ 14<br>-11 ≤ <i>k</i> ≤ 10<br>-21 ≤ <i>l</i> ≤ 22 | -26 ≤ <i>h</i> ≤ 25<br>-10 ≤ <i>k</i> ≤ 10<br>-28 ≤ <i>l</i> ≤ 28               | -19 ≤ <i>h</i> ≤ 22<br>-23 ≤ <i>k</i> ≤ 18<br>-28 ≤ <i>l</i> ≤ 18               |
| Reflections collected        | 3801                                                              | 8280                                                                            | 7535                                                                            |
| Independent reflections      | 3550                                                              | 6822                                                                            | 6087                                                                            |
| Rint.                        | 0.0387                                                            | 0.0465                                                                          | 0.0619                                                                          |
| R1 I > 2σ(I) <sup>a</sup>    | 0.0490                                                            | 0.1230                                                                          | 0.0760                                                                          |
| R1 (all data)                | 0.0533                                                            | 0.1412                                                                          | 0.0972                                                                          |
| wR2 (I > 2σ(I)) <sup>a</sup> | 0.1096                                                            | 0.2810                                                                          | 0.1284                                                                          |
| wR2 (all data)               | 0.1126                                                            | 0.2933                                                                          | 0.1368                                                                          |
| CCDC number                  | 1888530                                                           | 2014336                                                                         | 2014337                                                                         |

## 2. X-ray crystallography

**Table S2 Selected bond lengths (Å) and bond angles (°) of compound 1**

| Selected bond lengths (Å) |            |             |            |             |            |
|---------------------------|------------|-------------|------------|-------------|------------|
| Mg1- O10                  | 2.0802(16) | Mg1- O5     | 2.0874(15) | Mg1- O8     | 2.0351(17) |
| Mg1- O7                   | 2.0603(16) | Mg1- O6     | 2.0605(17) | Mg1- O9     | 2.0548(18) |
| Selected bond angles (°)  |            |             |            |             |            |
| O7- Mg1- O9               | 95.09(7)   | O5- Mg1- O6 | 90.32(7)   | O6- Mg1- O7 | 85.41(7)   |
| O7- Mg1- O10              | 169.86(7)  | O5- Mg1- O7 | 93.78(7)   | O6- Mg1- O8 | 98.70(7)   |
| O8- Mg1- O9               | 87.35(7)   | O5- Mg1- O8 | 170.51(8)  | O6- Mg1- O9 | 173.93(7)  |

|              |          |              |          |              |          |
|--------------|----------|--------------|----------|--------------|----------|
| O8- Mg1- O10 | 87.91(7) | O5- Mg1- O9  | 83.61(7) | O6- Mg1- O10 | 85.13(7) |
| O9- Mg1- O10 | 94.70(7) | O5- Mg1- O10 | 89.93(7) | O7- Mg1- O8  | 89.91(7) |

**Table S3** Selected bond lengths (Å) and bond angles (°) of compound **2**

| Selected bond lengths (Å) |            |             |            |             |            |
|---------------------------|------------|-------------|------------|-------------|------------|
| Ca1-O14                   | 2.604(4)   | Ca1-O20     | 2.434(6)   | Ca2-O11     | 2.467(6)   |
| Ca1-O16                   | 2.553(5)   | Ca1-O21     | 2.472(5)   | Ca2 -O12    | 2.475(4)   |
| Ca1-O17                   | 2.389(5)   | Ca1-O22     | 2.362(5)   | Ca2-O13     | 2.440(6)   |
| Ca1-O18                   | 2.458(5)   | Ca2-O9      | 2.377(5)   | Ca2-O14     | 2.567(5)   |
| Ca1-O19                   | 2.493(4)   | Ca2-O10     | 2.458(5)   | Ca2-O15     | 2.397(5)   |
| Selected bond angles (°)  |            |             |            |             |            |
| Ca1-O14-Ca2               | 110.74(17) | O11-Ca2-O15 | 143.14(17) | O14-Ca1-O21 | 75.72(15)  |
| Ca1-O16-Ca2               | 110.88(17) | O11-Ca2-O16 | 139.19(18) | O16-Ca1-O17 | 81.37(16)  |
| O9-Ca2-O10                | 82.83(16)  | O14-Ca2-O15 | 79.84(16)  | O16-Ca1-O20 | 121.27(15) |
| O9-Ca2-O15                | 97.60(16)  | O15-Ca2-O16 | 72.70(15)  | O18-Ca1-O21 | 117.14(16) |
| O9-Ca2-O14                | 143.41(15) | O14-Ca1-O19 | 129.54(15) | O20-Ca1-O21 | 68.63(17)  |

**Table S4** Selected bond lengths (Å) and bond angles (°) of compound **3**

| Selected bond lengths (Å) |            |             |            |             |            |
|---------------------------|------------|-------------|------------|-------------|------------|
| Sr1-O1                    | 2.692(4)   | Sr1-N2      | 2.837(4)   | Sr2-O15     | 2.572(4)   |
| Sr1-O9                    | 2.603(5)   | Sr1-O4      | 2.690(4)   | Sr2-O16     | 2.555(5)   |
| Sr1-O10                   | 2.638(4)   | Sr1-N9      | 2.773(4)   | Sr2-O17     | 2.644(4)   |
| Sr1-O11                   | 2.688(4)   | Sr2-O11     | 2.684(3)   | Sr2-O18     | 2.553(5)   |
| Sr1-O12                   | 2.481(5)   | Sr2-O13     | 2.650(4)   | Sr2-O19     | 2.654(4)   |
| Sr1-O13                   | 2.648(4)   | Sr2-O14     | 2.582(5)   |             |            |
| Selected bond angles (°)  |            |             |            |             |            |
| O1-Sr1-O9                 | 81.19(13)  | O4-Sr1-N9   | 47.23(12)  | O1-Sr1-N2   | 46.30(11)  |
| O9-Sr1-O10                | 154.35(14) | O9-Sr1-O11  | 126.53(13) | O9-Sr1-O12  | 77.84(17)  |
| O11-Sr1-O13               | 70.46(10)  | O10-Sr1-O11 | 68.74(11)  | O10-Sr1-O12 | 127.69(14) |
| O11-Sr2-O13               | 70.48(10)  | O11-Sr2-O14 | 83.73(13)  | O11-Sr2-O16 | 134.66(14) |
| O11-Sr2-O17               | 145.78(11) | O13-Sr2-O14 | 133.49(14) | O13-Sr2-O15 | 89.33(11)  |
| O13-Sr2-O17               | 142.55(11) | O13-Sr2-O18 | 77.86(13)  | O13-Sr2-O19 | 136.41(14) |
| O14-Sr2-O15               | 76.40(14)  | O14-Sr2-O16 | 141.57(16) | O14-Sr2-O17 | 75.20(14)  |

### 3. The distances of hydrogen bonds of compounds 1-3

Table S5 Hydrogen bond lengths / Å and angles / ° of compound 1-3

| <b>[Mg(H<sub>2</sub>O)<sub>6</sub>](DNAMT)·H<sub>2</sub>O (1)</b>                           |               |                 |                 |             |
|---------------------------------------------------------------------------------------------|---------------|-----------------|-----------------|-------------|
| <b>D-H···A</b>                                                                              | <b>d(D-H)</b> | <b>d(H···A)</b> | <b>d(D···A)</b> | <b>∠DHA</b> |
| N4-H4···O1                                                                                  | 0.8500        | 2.1200          | 2.578(2)        | 113.00      |
| N4-H4···O4                                                                                  | 0.8500        | 2.1200          | 2.935(2)        | 159.00      |
| N7-H7···O4                                                                                  | 0.8500        | 2.0800          | 2.545(2)        | 114.00      |
| N7-H7···O1                                                                                  | 0.8500        | 2.0500          | 2.852(2)        | 156.00      |
| O7-H7···O10                                                                                 | 0.8400        | 2.2000          | 3.017(2)        | 165.00      |
| O9-H9···O2                                                                                  | 0.8400        | 1.9600          | 2.792(2)        | 169.00      |
| O9-H9···O3                                                                                  | 0.8400        | 1.9300          | 2.760(2)        | 167.00      |
| O10-H10···O11                                                                               | 0.8400        | 1.9200          | 2.752(2)        | 169.00      |
| O11-H11···O2                                                                                | 0.8400        | 1.9700          | 2.791(2)        | 166.00      |
| <b>[Ca<sub>2</sub>(H<sub>2</sub>O)<sub>14</sub>](DNAMT)<sub>2</sub>·4H<sub>2</sub>O (2)</b> |               |                 |                 |             |
| <b>D-H···A</b>                                                                              | <b>d(D-H)</b> | <b>d(H···A)</b> | <b>d(D···A)</b> | <b>∠DHA</b> |
| N3-H3···O2                                                                                  | 0.8800        | 2.0600          | 2.558(7)        | 115.00      |
| N3-H3···O6                                                                                  | 0.8800        | 2.0700          | 2.770(7)        | 136.00      |
| N8-H8···O4                                                                                  | 0.8800        | 2.0400          | 2.542(6)        | 115.00      |
| N8-H8···O8                                                                                  | 0.8800        | 2.1000          | 2.832(6)        | 141.00      |
| N18-H18···O8                                                                                | 0.8800        | 2.0400          | 2.541(7)        | 116.00      |
| N18-H18···O2                                                                                | 0.8800        | 2.1700          | 2.855(7)        | 134.00      |
| N13-H13···O6                                                                                | 0.8800        | 2.0500          | 2.544(6)        | 115.00      |
| O9-H9A···O23                                                                                | 0.8400        | 2.0600          | 2.893(6)        | 174.00      |
| O10-H10B···O25                                                                              | 0.8400        | 1.9800          | 2.818(7)        | 176.00      |
| O11-H11A···O3                                                                               | 0.8400        | 2.0100          | 2.810(6)        | 160.00      |
| O11-H11B···O3                                                                               | 0.8400        | 2.3200          | 3.122(7)        | 159.00      |
| O12-H12B···O1                                                                               | 0.8400        | 2.0600          | 2.890(6)        | 169.00      |
| O18-H18B···O5                                                                               | 0.8400        | 1.9700          | 2.806(6)        | 174.00      |
| O20-H20A···O5                                                                               | 0.8700        | 2.4200          | 3.207(7)        | 151.00      |
| O22-H22A···O26                                                                              | 0.8400        | 2.2100          | 2.995(8)        | 156.00      |
| <b>[Sr<sub>2</sub>(DNAMT)(H<sub>2</sub>O)<sub>11</sub>](DNAMT)·2H<sub>2</sub>O (3)</b>      |               |                 |                 |             |
| <b>D-H···A</b>                                                                              | <b>d(D-H)</b> | <b>d(H···A)</b> | <b>d(D···A)</b> | <b>∠DHA</b> |
| N4-H4···O2                                                                                  | 0.8500        | 2.2100          | 2.600(5)        | 108.00      |
| N7-H7···O3                                                                                  | 0.8500        | 2.2200          | 2.580(6)        | 105.00      |
| N7-H7···O7                                                                                  | 0.8500        | 2.0700          | 2.900(6)        | 167.00      |
| O9-H9B···O8                                                                                 | 0.8400        | 2.0300          | 2.798(6)        | 152.00      |
| O13-H13B···O20                                                                              | 0.8400        | 2.0500          | 2.858(5)        | 161.00      |
| N14-H14···O6                                                                                | 0.8500        | 2.0400          | 2.539(6)        | 117.00      |

|                |        |        |          |        |
|----------------|--------|--------|----------|--------|
| N14-H14···O2   | 0.8500 | 2.2100 | 3.003(6) | 156.00 |
| O15-H15B···O10 | 0.8400 | 2.5400 | 3.058(5) | 121.00 |
| O16-H16A···O3  | 0.8400 | 2.6000 | 3.239(6) | 134.00 |
| O16-H16A···O4  | 0.8400 | 2.1400 | 2.969(6) | 169.00 |
| N17-H17···O7   | 0.8500 | 2.0000 | 2.561(6) | 123.00 |
| N17-H17···O3   | 0.8500 | 2.2500 | 3.013(6) | 149.00 |
| O17-H17A···O1  | 0.8400 | 2.2600 | 3.050(5) | 157.00 |
| O19-H19B···O1  | 0.8400 | 2.0700 | 2.861(5) | 157.00 |
| O19-H19B···O2  | 0.8400 | 2.5800 | 3.319(5) | 147.00 |
| O20-20B···O5   | 0.8400 | 2.0000 | 2.832(5) | 169.00 |

#### 4. The first exothermic decomposition peak temperature with four heating rates

**Table S6 The first exothermic decomposition peak temperatures tested at different heating rates of compounds 1-3**

| compound | The first exothermic decomposition peak temperatures (K) |                       |                       |                       |
|----------|----------------------------------------------------------|-----------------------|-----------------------|-----------------------|
|          | 5K·min <sup>-1</sup>                                     | 10K·min <sup>-1</sup> | 15K·min <sup>-1</sup> | 20K·min <sup>-1</sup> |
| 1        | 537.65                                                   | 542.95                | 547.05                | 549.25                |
| 2        | 554.85                                                   | 556.55                | 561.75                | 56.955                |
| 3        | 578.55                                                   | 586.15                | 590.85                | 595.65                |

#### 5. Non-isothermal kinetics analysis

The peak temperatures of first decomposition processes were used to calculate kinetics parameters (apparent activation energies ( $E_a$ ) and the pre-exponential factor (A)), by Kissinger's method<sup>1</sup> (Eq. (1)) and Ozawa's method<sup>2</sup> (Eq. (2)).

$$\ln \frac{\beta}{T_p^2} = \ln \frac{AR}{E_a} - \frac{E_a}{RT_p} \quad (1)$$

$$\lg \beta + 0.4567 \frac{E_a}{RT_p} = C \quad (2)$$

Where,  $T_p$  is the peak temperature (K),  $R$  is the gas constant 8.314 (J·mol<sup>-1</sup>·K<sup>-1</sup>),  $\beta$  is the linear heating rate (°C·min<sup>-1</sup>),  $C$  is a constant,  $E_a$  is the average of  $E_k$  and  $E_o$  (kJ·mol<sup>-1</sup>). The results are listed in Table S7.

**Table S7 Non-isothermal reaction kinetics parameters of compounds 1 - 3**

| compound | Kissinger's method | Ozawa's method | $E_a$ /kJ·mol <sup>-1</sup> |
|----------|--------------------|----------------|-----------------------------|
|----------|--------------------|----------------|-----------------------------|

|   | $E_K/\text{kJ}\cdot\text{mol}^{-1}$ | $\lg A_K$ | $R_K$ | $E_O/\text{kJ}\cdot\text{mol}^{-1}$ | $R_O$ |       |
|---|-------------------------------------|-----------|-------|-------------------------------------|-------|-------|
| 1 | 66.90                               | 11.2      | -0.99 | 67.89                               | -0.99 | 67.39 |
| 2 | 65.09                               | 10.1      | -0.91 | 66.44                               | -0.92 | 65.76 |
| 3 | 64.10                               | 8.46      | -0.99 | 64.01                               | -0.99 | 64.06 |

## 6. The calculation of thermodynamics parameters

The thermodynamics parameters ( $T_{p0}$ ,  $T_b$ ,  $\Delta S^\ddagger$ ,  $\Delta H^\ddagger$ ,  $\Delta G^\ddagger$ ) were obtained by the Zhang's calculation equations<sup>3</sup> and the results list in Table S8. The equations for these calculations are as follows:

$$T_{Pi} = T_{p0} + a\beta + b\beta^2 + c\beta^3 \quad (3)$$

$$T_b = (E_k - \sqrt{E_k^2 - 4E_kRT_{p0}})/2R \quad (4)$$

$$A = (k_B T_{p0}/h) \exp(\Delta S^\ddagger/R) \quad (5)$$

$$\Delta H^\ddagger = E_k - RT_{p0} \quad (6)$$

$$\Delta G^\ddagger = \Delta H^\ddagger - T_{p0}\Delta S^\ddagger \quad (7)$$

where  $a$ ,  $b$ , and  $c$  are coefficients,  $k_B$  is the Boltzmann constant ( $1.381 \times 10^{-23} \text{ J}\cdot\text{K}^{-1}$ ) and  $h$  is the Planck constant ( $6.626 \times 10^{-34} \text{ J}\cdot\text{s}$ ).  $T_b$  is the critical temperature of thermal explosion,  $T_{p0}$  is the peak temperature corresponding to  $\beta \rightarrow 0$ ,  $\Delta S^\ddagger$  is activation entropy,  $\Delta H^\ddagger$  is activation enthalpy and  $\Delta G^\ddagger$  is free energy of activation.

**Table S8 Calculation of critical temperatures of thermal explosion,  $\Delta S^\ddagger$ ,  $\Delta H^\ddagger$  and  $\Delta G^\ddagger$**

| compound | $T_{p0}/\text{K}$ | $T_b/\text{K}$ | $\Delta S^\ddagger/\text{J}\cdot\text{K}^{-1}\cdot\text{mol}^{-1}$ | $\Delta H^\ddagger/\text{kJ}\cdot\text{mol}^{-1}$ | $\Delta G^\ddagger/\text{kJ}\cdot\text{mol}^{-1}$ |
|----------|-------------------|----------------|--------------------------------------------------------------------|---------------------------------------------------|---------------------------------------------------|
| 1        | 531.85            | 572.59         | -35.31                                                             | 62.48                                             | 81.26                                             |
| 2        | 560.15            | 607.25         | -56.80                                                             | 60.43                                             | 92.25                                             |
| 3        | 565.05            | 613.94         | -88.27                                                             | 59.40                                             | 109.28                                            |

## 7. References

- 1 H. E. Kissinger, Anal. Chem., 1957, 29, 1702–1706.
- 2 T. Ozawa, Bull. Chem. Soc. Jpn., 1965, 38, 1881–1886.
- 3 T. Zhang, R. Hu, X. Yi and F. Li, Thermochim. Acta, 1994, 244, 171-176.
